# Supplementary material for: First in situ Lu–Hf garnet date for a lithium–caesium–tantalum (LCT) pegmatite from the Kietyönmäki Li deposit, Somero–Tammela pegmatite region, SW Finland
Source: Copernicus journal article supplement (doi:10.5194/ejm-36-433-2024), 2024-06-03
Supplement: Supplementary file 1 [file ejm-36-433-2024-supplement.pdf]

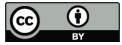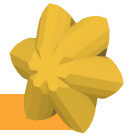

*Supplement of*

**First in situ Lu–Hf garnet date for a lithium–caesium–tantalum (LCT) pegmatite from the Kietyönmäki Li deposit, Somero–Tammela pegmatite region, SW Finland**

**Krisztián Szentpéteri et al.**

*Correspondence to:* Kathryn Cutts ([kathryn.cutts@gtk.fi](mailto:kathryn.cutts@gtk.fi))

The copyright of individual parts of the supplement might differ from the article licence.

**Table S1. Laser ablation ICP–MS/MS Lu-Hf isotope results for garnet unknowns. Lu-Hf isotope data is also provided for primary reference material NIST610 glass, secondary garnet standard Hogsbo, Lu (measured from 175) and Hf (measured from 178) represent total Lu and Hf elemental concentrations, calculated by assuming 'normal' abundances of these isotopes.**

| Spot no.   | Element concentrations (ppm) and isotope ratios for "inverse" isochron |        |       |       |             |               |             |               |              |
|------------|------------------------------------------------------------------------|--------|-------|-------|-------------|---------------|-------------|---------------|--------------|
|            | Lu 175                                                                 | Hf 176 | Hf177 | Lu176 | 176Lu/176Hf | $\pm 2\sigma$ | 177Hf/176Hf | $\pm 2\sigma$ | $\rho$ (rho) |
| NIST_A-001 |                                                                        |        |       |       | 0.4879954   | 0.00239       | 3.5399486   | 0.00793       | 0.329        |
| NIST_A-002 |                                                                        |        |       |       | 0.4907853   | 0.00241       | 3.5418246   | 0.00794       | 0.068        |
| NIST_A-003 |                                                                        |        |       |       | 0.4883683   | 0.0024        | 3.5422391   | 0.00794       | 0.187        |
| NIST_A-004 |                                                                        |        |       |       | 0.4876688   | 0.00239       | 3.5436807   | 0.00794       | 0.149        |
| NIST_A-005 |                                                                        |        |       |       | 0.4892319   | 0.0024        | 3.5471153   | 0.00795       | 0.174        |
| NIST_A-006 |                                                                        |        |       |       | 0.4872049   | 0.00239       | 3.543237    | 0.00794       | 0.24         |
| NIST_A-007 |                                                                        |        |       |       | 0.489986    | 0.0024        | 3.5471934   | 0.00795       | 0.008        |
| NIST_A-008 |                                                                        |        |       |       | 0.4909379   | 0.00241       | 3.5514249   | 0.00796       | 0.422        |
| NIST_A-009 |                                                                        |        |       |       | 0.4884488   | 0.0024        | 3.5480509   | 0.00795       | 0.16         |
| NIST_A-010 |                                                                        |        |       |       | 0.488324    | 0.0024        | 3.5483286   | 0.00795       | 0.269        |
| NIST_A-011 |                                                                        |        |       |       | 0.4868647   | 0.00239       | 3.5516008   | 0.00796       | 0.352        |
| NIST_A-012 |                                                                        |        |       |       | 0.4899419   | 0.0024        | 3.5525928   | 0.00796       | 0.323        |
| NIST_A-013 |                                                                        |        |       |       | 0.4886408   | 0.0024        | 3.5452589   | 0.00794       | 0.268        |
| NIST_A-014 |                                                                        |        |       |       | 0.4885941   | 0.0024        | 3.5498364   | 0.00795       | 0.319        |
| NIST_A-015 |                                                                        |        |       |       | 0.4905318   | 0.00241       | 3.5491897   | 0.00795       | -0.007       |
| NIST_A-016 |                                                                        |        |       |       | 0.4880659   | 0.0024        | 3.5435809   | 0.00794       | 0.394        |
| NIST_A-017 |                                                                        |        |       |       | 0.488095    | 0.0024        | 3.5398248   | 0.00793       | 0.377        |
| NIST_A-018 |                                                                        |        |       |       | 0.4892574   | 0.0024        | 3.5448598   | 0.00794       | 0.28         |
| NIST_P-001 |                                                                        |        |       |       | 0.4884468   | 0.00216       | 3.5371111   | 0.01085       | 0.15         |
| NIST_P-002 |                                                                        |        |       |       | 0.4883444   | 0.00216       | 3.5450066   | 0.01087       | 0.226        |
| NIST_P-003 |                                                                        |        |       |       | 0.4897541   | 0.00216       | 3.540534    | 0.01086       | 0.044        |
| NIST_P-004 |                                                                        |        |       |       | 0.4895576   | 0.00216       | 3.5530892   | 0.01089       | 0.188        |
| NIST_P-005 |                                                                        |        |       |       | 0.4877768   | 0.00216       | 3.543694    | 0.01087       | 0.464        |
| NIST_P-006 |                                                                        |        |       |       | 0.4903882   | 0.00217       | 3.5490615   | 0.01088       | 0.19         |
| NIST_P-007 |                                                                        |        |       |       | 0.4879711   | 0.00216       | 3.5519191   | 0.01089       | 0.294        |
| NIST_P-008 |                                                                        |        |       |       | 0.4891504   | 0.00216       | 3.5488775   | 0.01088       | 0.12         |
| NIST_P-009 |                                                                        |        |       |       | 0.4877865   | 0.00216       | 3.5516736   | 0.01089       | 0.097        |
| NIST_P-010 |                                                                        |        |       |       | 0.4873541   | 0.00215       | 3.5482152   | 0.01088       | 0.282        |
| NIST_P-011 |                                                                        |        |       |       | 0.4863784   | 0.00215       | 3.538789    | 0.01085       | 0.165        |
| NIST_P-012 |                                                                        |        |       |       | 0.4901609   | 0.00217       | 3.5468897   | 0.01088       | 0.301        |
| NIST_P-013 |                                                                        |        |       |       | 0.4901078   | 0.00217       | 3.5508314   | 0.01089       | 0.196        |
| NIST_P-014 |                                                                        |        |       |       | 0.4909826   | 0.00217       | 3.5581325   | 0.01091       | 0.402        |
| NIST_P-015 |                                                                        |        |       |       | 0.4885063   | 0.00216       | 3.5433779   | 0.01086       | 0.147        |
| NIST_P-016 |                                                                        |        |       |       | 0.4907476   | 0.00217       | 3.5541941   | 0.0109        | 0.135        |
| NIST_P-017 |                                                                        |        |       |       | 0.4884683   | 0.00216       | 3.5486621   | 0.01088       | 0.05         |
| NIST_P-018 |                                                                        |        |       |       | 0.4883513   | 0.00216       | 3.5524813   | 0.01089       | 0.236        |
| NIST_P-019 |                                                                        |        |       |       | 0.4889188   | 0.00216       | 3.5493865   | 0.01088       | 0.156        |
| NIST_P-020 |                                                                        |        |       |       | 0.4875239   | 0.00215       | 3.5409499   | 0.01086       | 0.436        |
| NIST_P-021 |                                                                        |        |       |       | 0.4885452   | 0.00216       | 3.5471224   | 0.01088       | 0.535        |
| NIST_P-022 |                                                                        |        |       |       | 0.4886454   | 0.00216       | 3.5528109   | 0.01089       | 0.255        |
| NIST_P-023 |                                                                        |        |       |       | 0.487879    | 0.00216       | 3.5458761   | 0.01087       | 0.405        |

| Spot no.         | Element concentrations (ppm) and isotope ratios for "inverse" isochron |        |       |        |             |               |             |               |              |
|------------------|------------------------------------------------------------------------|--------|-------|--------|-------------|---------------|-------------|---------------|--------------|
|                  | Lu 175                                                                 | Hf 176 | Hf177 | Lu176  | 176Lu/176Hf | $\pm 2\sigma$ | 177Hf/176Hf | $\pm 2\sigma$ | $\rho$ (rho) |
| NIST_P-024       |                                                                        |        |       |        | 0.4889659   | 0.00216       | 3.55013     | 0.01089       | 0.407        |
| NIST_P-025       |                                                                        |        |       |        | 0.4886608   | 0.00216       | 3.5485239   | 0.01088       | 0.212        |
| NIST_P-025       |                                                                        |        |       |        | 0.4573385   | 0.00333       | 3.5417508   | 0.02059       | 0.212        |
| NIST_P-026       |                                                                        |        |       |        | 0.490241    | 0.00217       | 3.5515297   | 0.01089       |              |
| NIST_P-026       |                                                                        |        |       |        | 0.458822    | 0.00334       | 3.5447608   | 0.02061       | 0.302        |
| NIST_P-027       |                                                                        |        |       |        | 0.4882621   | 0.00216       | 3.5406696   | 0.01086       | 0.395        |
| NIST_P-028       |                                                                        |        |       |        | 0.4882509   | 0.00216       | 3.5476852   | 0.01088       | 0.193        |
| NIST_P-029       |                                                                        |        |       |        | 0.4903241   | 0.00217       | 3.5420561   | 0.01086       | 0.163        |
| NIST_P-030       |                                                                        |        |       |        | 0.4896472   | 0.00216       | 3.5462182   | 0.01087       | 0.239        |
| NIST_P-031       |                                                                        |        |       |        | 0.4873871   | 0.00215       | 3.5378709   | 0.01085       | 0.171        |
| NIST_P-032       |                                                                        |        |       |        | 0.4899355   | 0.00216       | 3.5459145   | 0.01087       | 0.271        |
| NIST_P-033       |                                                                        |        |       |        | 0.4881122   | 0.00216       | 3.5423119   | 0.01086       | 0.511        |
| NIST_P-034       |                                                                        |        |       |        | 0.4879697   | 0.00216       | 3.5407761   | 0.01086       | 0.236        |
| NIST_P-035       |                                                                        |        |       |        | 0.4890216   | 0.00216       | 3.5484985   | 0.01088       | 0.302        |
| NIST_P-036       |                                                                        |        |       |        | 0.4893652   | 0.00216       | 3.5408841   | 0.01086       | 0.293        |
| NIST_start-001   |                                                                        |        |       |        | 0.5059903   | 0.00349       | 3.5386777   | 0.01085       | 0.227        |
| NIST_start-002   |                                                                        |        |       |        | 0.5035921   | 0.00347       | 3.5550948   | 0.0109        | 0.252        |
| NIST_start-003   |                                                                        |        |       |        | 0.5001702   | 0.00345       | 3.5386364   | 0.01085       | 0.427        |
| NIST_start-004   |                                                                        |        |       |        | 0.496382    | 0.00342       | 3.5357961   | 0.01084       | 0.275        |
| NIST_start-005   |                                                                        |        |       |        | 0.4969343   | 0.00343       | 3.5480998   | 0.01088       | 0.176        |
| NIST_start-006   |                                                                        |        |       |        | 0.4945552   | 0.00341       | 3.5473287   | 0.01088       | 0.239        |
| NIST_start-007   |                                                                        |        |       |        | 0.4918365   | 0.00339       | 3.5427653   | 0.01086       | -0.103       |
| NIST_start-008   |                                                                        |        |       |        | 0.4913584   | 0.00339       | 3.5402158   | 0.01086       | 0.246        |
| Hogsbo_ana-001   | 534.84                                                                 | 5.0378 | 0.043 | 556.34 | 51.172555   | 0.50385       | 0.0299227   | 0.0015        | 0.303        |
| Hogsbo_ana-002   | 568.97                                                                 | 5.7596 | 0.044 | 634.71 | 51.269768   | 0.47391       | 0.0273076   | 0.00137       | 0.116        |
| Hogsbo_ana-003   | 571.78                                                                 | 5.3508 | 0.045 | 590.12 | 51.097768   | 0.48359       | 0.029524    | 0.00164       | -0.011       |
| Hogsbo_ana-004   | 611.3                                                                  | 5.7613 | 0.036 | 632.05 | 50.920836   | 0.4732        | 0.0224494   | 0.00119       | 0.028        |
| Hogsbo_ana-005   | 354.7                                                                  | 3.4551 | 0.011 | 381.8  | 51.191899   | 0.55859       | 0.0112196   | 0.00112       | 0.134        |
| Hogsbo_ana-006   | 298.25                                                                 | 2.9087 | 0.026 | 321.6  | 51.498111   | 0.60195       | 0.0316336   | 0.00209       | 0.055        |
| Hogsbo_ana-007   | 494.26                                                                 | 4.8129 | 0.041 | 528    | 51.12297    | 0.51476       | 0.0304333   | 0.00155       | -0.042       |
| Hogsbo_ana-008   | 572.88                                                                 | 5.8107 | 0.035 | 635.77 | 50.76981    | 0.47918       | 0.0214939   | 0.00109       | 0.116        |
| Hogsbo_ana-009   | 473.23                                                                 | 4.4177 | 0.025 | 488.65 | 51.268472   | 0.50813       | 0.0204235   | 0.00133       | -0.089       |
| Hogsbo_ana-010   | 530.5                                                                  | 5.1636 | 0.038 | 570.07 | 51.386762   | 0.49397       | 0.0260481   | 0.00144       | -0.019       |
| Hogsbo_ana-011   | 714.79                                                                 | 6.7827 | 0.037 | 753.56 | 51.60506    | 0.48187       | 0.0194034   | 0.0011        | -0.314       |
| Hogsbo_ana-012   | 704.33                                                                 | 6.9837 | 0.022 | 773.54 | 51.464495   | 0.47437       | 0.0112182   | 0.00073       | -0.008       |
| Hogsbo_ana-013   | 494.33                                                                 | 4.7998 | 0.042 | 532.48 | 51.6688     | 0.51742       | 0.0310983   | 0.00153       | -0.131       |
| Hogsbo_ana-014   | 390                                                                    | 3.5973 | 0.038 | 395.38 | 51.067602   | 0.55779       | 0.0379214   | 0.00194       | 0.11         |
| Hogsbo_ana-015   | 571.27                                                                 | 5.526  | 0.037 | 607.95 | 50.997835   | 0.48911       | 0.0237297   | 0.00125       | 0.181        |
| Hogsbo_ana-016   | 519.14                                                                 | 5.1986 | 0.045 | 566.18 | 50.604399   | 0.51655       | 0.0308838   | 0.00143       | 0.206        |
| Hogsbo_pulse-001 | 210.24                                                                 | 1.9491 | 0.072 | 207.59 | 49.298923   | 1.33749       | 0.1307971   | 0.02076       | 0.126        |
| Hogsbo_pulse-002 | 213.17                                                                 | 1.9879 | 0.055 | 210.27 | 48.874243   | 1.35076       | 0.0969994   | 0.00867       | 0.225        |
| Hogsbo_pulse-003 | 5.357                                                                  | 0.0902 | 0.037 | 5.9915 | 30.979958   | 2.45828       | 1.4615665   | 0.18064       | 0.462        |
| Hogsbo_pulse-004 | 160.86                                                                 | 1.8245 | 0.066 | 188.44 | 47.655601   | 1.3393        | 0.1269367   | 0.01023       | -0.349       |
| Hogsbo_pulse-005 | 152.53                                                                 | 1.568  | 0.055 | 162.05 | 47.624265   | 1.41948       | 0.1229736   | 0.01069       | -0.41        |
| Hogsbo_pulse-006 | 11.249                                                                 | 0.1504 | 0.043 | 11.593 | 35.859051   | 1.66162       | 1.0188147   | 0.06627       | 0.221        |
| Hogsbo_pulse-007 | 160.32                                                                 | 1.5736 | 0.06  | 163.53 | 47.869425   | 1.45882       | 0.1353112   | 0.01155       | -0.117       |
| Hogsbo_pulse-008 | 139.95                                                                 | 1.3521 | 0.056 | 140.68 | 48.12753    | 1.54659       | 0.1457958   | 0.01274       | -0.104       |
| Hogsbo_pulse-009 | 9.3577                                                                 | 0.121  | 0.041 | 8.5758 | 32.977122   | 1.77131       | 1.2027974   | 0.08241       | 0.209        |

| Spot no.         | Element concentrations (ppm) and isotope ratios for "inverse" isochron |        |       |        |             |               |             |               |              |
|------------------|------------------------------------------------------------------------|--------|-------|--------|-------------|---------------|-------------|---------------|--------------|
|                  | Lu 175                                                                 | Hf 176 | Hf177 | Lu176  | 176Lu/176Hf | $\pm 2\sigma$ | 177Hf/176Hf | $\pm 2\sigma$ | $\rho$ (rho) |
| Hogsbo_pulse-010 | 105.96                                                                 | 1.134  | 0.057 | 116.78 | 47.547869   | 1.77324       | 0.1768986   | 0.0196        | 0.221        |
| Hogsbo_pulse-011 | 72.436                                                                 | 0.8763 | 0.061 | 87.187 | 46.135491   | 1.93857       | 0.245048    | 0.02337       | 0.055        |
| Hogsbo_pulse-012 | 8.2186                                                                 | 0.1356 | 0.053 | 9.2103 | 31.413516   | 1.50432       | 1.3733132   | 0.08659       | 0.288        |
| Hogsbo_pulse-013 | 101.34                                                                 | 1.2015 | 0.057 | 122.05 | 47.091675   | 1.64806       | 0.1668844   | 0.01706       | 0.228        |
| Hogsbo_pulse-014 | 37.418                                                                 | 0.4485 | 0.061 | 41.279 | 42.701592   | 2.46825       | 0.4853981   | 0.06241       | 0.309        |
| Hogsbo_pulse-015 | 5.8606                                                                 | 0.1057 | 0.043 | 7.2166 | 31.656977   | 2.06656       | 1.4327045   | 0.12511       | 0.342        |
| Hogsbo_pulse-016 | 249.95                                                                 | 2.5949 | 0.061 | 275.12 | 49.456937   | 1.17781       | 0.0841873   | 0.00802       | 0.272        |
| Hogsbo_pulse-017 | 285.84                                                                 | 2.6161 | 0.061 | 278.19 | 49.475719   | 1.20362       | 0.082421    | 0.00724       | 0.094        |
| Hogsbo_pulse-018 | 214.47                                                                 | 2.2561 | 0.052 | 240.69 | 49.669479   | 1.33686       | 0.082452    | 0.01144       | -0.009       |
| Hogsbo_pulse-019 | 184.41                                                                 | 1.8505 | 0.044 | 200.06 | 50.381093   | 1.42894       | 0.0845037   | 0.00825       | -0.03        |
| Hogsbo_pulse-020 | 254.24                                                                 | 2.5324 | 0.056 | 264.18 | 48.470176   | 1.26381       | 0.0782206   | 0.00799       | 0.176        |
| Hogsbo_pulse-021 | 244.44                                                                 | 2.567  | 0.059 | 265.78 | 48.063493   | 1.22477       | 0.0813305   | 0.00752       | 0.116        |
| Hogsbo_pulse-022 | 281.08                                                                 | 2.7262 | 0.062 | 287.81 | 49.139169   | 1.12933       | 0.0807463   | 0.0065        | 0.316        |
| Hogsbo_pulse-023 | 81.541                                                                 | 0.8006 | 0.059 | 81.887 | 47.467144   | 2.05141       | 0.2605506   | 0.02673       | 0.052        |
| Hogsbo_pulse-024 | 287.1                                                                  | 2.4261 | 0.062 | 262    | 50.09228    | 1.26928       | 0.09071     | 0.00855       | 0.032        |
| Hogsbo_pulse-025 | 299.32                                                                 | 2.6468 | 0.059 | 287.08 | 50.310327   | 1.21234       | 0.0797909   | 0.00829       | 0.176        |
| Hogsbo_pulse-026 | 298.57                                                                 | 2.7186 | 0.057 | 284.69 | 48.795447   | 1.15606       | 0.0744884   | 0.0068        | -0.076       |
| Hogsbo_pulse-027 | 235.4                                                                  | 2.5124 | 0.061 | 268.13 | 49.568761   | 1.25652       | 0.0860808   | 0.00727       | 0.188        |
| Hogsbo_pulse-028 | 4.9859                                                                 | 0.1084 | 0.041 | 8.3117 | 35.119946   | 4.04401       | 1.3225069   | 0.20253       | -0.323       |
| Hogsbo_pulse-029 | 67.591                                                                 | 0.7242 | 0.057 | 73.201 | 46.472917   | 2.108         | 0.2748667   | 0.0298        | 0.427        |
| Hogsbo_pulse-030 | 71.871                                                                 | 0.6691 | 0.049 | 68.091 | 47.339119   | 2.18363       | 0.2605975   | 0.0291        | 0.261        |
| Hogsbo_pulse-031 | 92.9                                                                   | 0.7471 | 0.049 | 78.088 | 48.590491   | 2.10453       | 0.2312448   | 0.02516       | 0.341        |
| Hogsbo_pulse-032 | 288.93                                                                 | 2.6122 | 0.062 | 279.7  | 49.709496   | 1.18321       | 0.0837413   | 0.00705       | 0.139        |

**Element concentrations (ppm) and isotope ratios for "inverse" isochron**

|           | Lu 175   | Hf 176  | Hf177   | Lu176   | 176Lu/176Hf | $\pm 2\sigma$ | 177Hf/176Hf | $\pm 2\sigma$ | $\rho$ (rho) |
|-----------|----------|---------|---------|---------|-------------|---------------|-------------|---------------|--------------|
| Keity-001 | 9.340515 | 0.56436 | 0.39614 | 10.5437 | 8.68032     | 0.14527       | 2.489709    | 0.04547       | 0.40084      |
| Keity-002 | 9.365293 | 0.47819 | 0.33771 | 8.93807 | 8.67905     | 0.14886       | 2.506769    | 0.05028       | 0.45545      |
| Keity-003 | 7.745787 | 0.49201 | 0.38833 | 6.55852 | 6.18628     | 0.1032        | 2.799017    | 0.05277       | 0.62517      |
| Keity-004 | 3.214942 | 0.42006 | 0.35618 | 4.07621 | 4.51276     | 0.0796        | 3.011711    | 0.05968       | 0.58694      |
| Keity-005 | 6.347824 | 0.48604 | 0.37629 | 7.54699 | 7.27343     | 0.12069       | 2.743033    | 0.08788       | 0.09649      |
| Keity-006 | 5.47874  | 0.45419 | 0.36383 | 6.0956  | 6.24247     | 0.10566       | 2.847033    | 0.05441       | 0.62846      |
| Keity-007 | 3.131837 | 0.34819 | 0.30319 | 2.60547 | 3.47954     | 0.06696       | 3.092817    | 0.06641       | 0.27316      |
| Keity-008 | 2.19798  | 0.33503 | 0.29635 | 2.61574 | 3.62713     | 0.071         | 3.139133    | 0.06857       | 0.5699       |
| Keity-009 | 0.206348 | 0.44519 | 0.43412 | 0.42851 | 0.44746     | 0.01329       | 3.460986    | 0.06557       | 0.45664      |
| Keity-010 | 0.675346 | 0.34144 | 0.30513 | 1.50085 | 2.03228     | 0.05459       | 3.155754    | 0.09311       | 0.42996      |
| Keity-011 | 3.062204 | 0.47107 | 0.42226 | 2.97324 | 2.93413     | 0.07487       | 3.181739    | 0.0574        | 0.19248      |
| Keity-012 | 1.065944 | 0.30761 | 0.29771 | 0.78733 | 1.18932     | 0.02554       | 3.435819    | 0.07729       | 0.29532      |
| Keity-013 | 0.435736 | 0.3348  | 0.33359 | 0.37035 | 0.51438     | 0.01596       | 3.537686    | 0.07658       | 0.3122       |
| Keity-014 | 3.281235 | 0.43737 | 0.37965 | 3.50179 | 3.72515     | 0.06737       | 3.083653    | 0.0581        | 0.56888      |
| Keity-015 | 2.269391 | 0.38184 | 0.34645 | 2.17151 | 2.642       | 0.04788       | 3.222169    | 0.06413       | 0.60254      |
| Keity-016 | 2.747273 | 0.43939 | 0.38754 | 3.15567 | 3.33406     | 0.05654       | 3.129144    | 0.0617        | 0.4111       |
| Keity-017 | 3.589765 | 0.43461 | 0.38234 | 3.20023 | 3.42216     | 0.06233       | 3.12575     | 0.06333       | 0.49538      |
| Keity-018 | 3.05318  | 0.95658 | 0.91231 | 3.21679 | 1.56193     | 0.02892       | 3.385838    | 0.04565       | 0.21268      |
| Keity-019 | 0.978443 | 0.55528 | 0.53053 | 1.44913 | 1.20815     | 0.04087       | 3.389714    | 0.05944       | 0.07458      |
| Keity-020 | 1.608436 | 0.86656 | 0.81812 | 2.78256 | 1.49125     | 0.03021       | 3.349935    | 0.04641       | 0.27991      |
| Keity-021 | 1.164123 | 0.51902 | 0.50444 | 1.12623 | 1.00931     | 0.02477       | 3.456579    | 0.06137       | 0.3358       |
| Keity-022 | 3.930215 | 0.37879 | 0.31493 | 3.4648  | 4.25712     | 0.08285       | 2.956301    | 0.06492       | 0.58449      |
| Keity-023 | 0.954142 | 0.31457 | 0.29979 | 0.86492 | 1.27506     | 0.02798       | 3.37981     | 0.0783        | 0.23773      |
| Keity-024 | 1.682597 | 0.32412 | 0.30448 | 1.46433 | 2.10125     | 0.05992       | 3.338689    | 0.07602       | 0.54146      |
| Keity-025 | 2.190079 | 0.30039 | 0.28769 | 0.92276 | 1.4246      | 0.0322        | 3.399009    | 0.08182       | 0.50171      |
| Keity-026 | 8.114747 | 0.53314 | 0.41225 | 7.77453 | 6.76926     | 0.11503       | 2.745947    | 0.05146       | 0.60651      |
| Keity-027 | 6.577639 | 0.46197 | 0.34759 | 7.21811 | 7.26022     | 0.12608       | 2.671777    | 0.0529        | 0.5933       |
| Keity-028 | 1.178264 | 0.27557 | 0.26348 | 1.00109 | 1.68695     | 0.04266       | 3.397802    | 0.08349       | 0.31589      |
| Keity-029 | 2.54296  | 0.3274  | 0.29773 | 2.2597  | 3.20474     | 0.08978       | 3.22838     | 0.10102       | 0.63949      |
| Keity-030 | 1.911157 | 0.38984 | 0.37303 | 1.68807 | 2.00978     | 0.05808       | 3.398164    | 0.09599       | 0.22941      |
| Keity-031 | 6.389823 | 0.50856 | 0.39386 | 6.88477 | 6.29109     | 0.17638       | 2.755417    | 0.0698        | 0.22228      |
| Keity-032 | 3.391394 | 0.4759  | 0.42422 | 2.86061 | 2.78612     | 0.064         | 3.160624    | 0.08062       | 0.53334      |
| Keity-033 | -0.09844 | 0.41936 | 0.40889 | 0.83022 | 0.91723     | 0.02522       | 3.450409    | 0.09748       | 0.5354       |
| Keity-034 | -0.98037 | 0.33525 | 0.33013 | 0.44171 | 0.61227     | 0.03317       | 3.498609    | 0.10794       | 0.39683      |
| Keity-035 | -0.12728 | 0.29566 | 0.28541 | 0.63318 | 0.99518     | 0.03112       | 3.431637    | 0.11141       | 0.34604      |
| Keity-036 | -0.73474 | 0.29214 | 0.28089 | 0.38974 | 0.6193      | 0.02035       | 3.410348    | 0.11039       | 0.53015      |
| Keity-037 | -0.2952  | 0.36991 | 0.35985 | 0.58252 | 0.73009     | 0.02354       | 3.451938    | 0.0976        | 0.57304      |
| Keity-038 | 0.263322 | 0.28775 | 0.27951 | 0.45839 | 0.74046     | 0.02347       | 3.447716    | 0.10988       | 0.56141      |
| Keity-039 | 0.207985 | 0.84378 | 0.81961 | 0.91571 | 0.50363     | 0.0333        | 3.450529    | 0.0716        | -0.2034      |
| Keity-040 | 3.279375 | 1.02392 | 1.00666 | 1.5182  | 0.6875      | 0.01959       | 3.483899    | 0.06412       | 0.33557      |
| Keity-041 | -0.02081 | 0.19517 | 0.19838 | 0.30469 | 0.7263      | 0.03336       | 3.604255    | 0.14394       | 0.38255      |
| Keity-042 | 3.117478 | 0.34709 | 0.29861 | 2.72348 | 3.64333     | 0.09765       | 3.05431     | 0.0923        | 0.51119      |
| Keity-043 | 2.287459 | 0.41193 | 0.36242 | 3.34977 | 3.77398     | 0.0908        | 3.123874    | 0.08763       | 0.59487      |
| Keity-044 | 2.307696 | 0.35736 | 0.31136 | 2.70513 | 3.51486     | 0.09056       | 3.089285    | 0.08945       | 0.44656      |
| Keity-045 | 1.427942 | 0.40834 | 0.37328 | 2.45526 | 2.78342     | 0.06951       | 3.236323    | 0.08967       | 0.49036      |
| Keity-046 | 3.519904 | 0.45873 | 0.39887 | 3.92708 | 3.97212     | 0.09102       | 3.078349    | 0.07849       | 0.48199      |

**Element concentrations (ppm) and isotope ratios for "inverse" isochron**

|           | <b>Lu 175</b> | <b>Hf 176</b> | <b>Hf177</b> | <b>Lu176</b> | <b>176Lu/176Hf</b> | <b>± 2σ</b> | <b>177Hf/176Hf</b> | <b>± 2σ</b> | <b>ρ (rho)</b> |
|-----------|---------------|---------------|--------------|--------------|--------------------|-------------|--------------------|-------------|----------------|
| Keity-047 | 0.915917      | 0.35287       | 0.33501      | 1.31935      | 1.7281             | 0.08579     | 3.35374            | 0.09946     | 0.34352        |
| Keity-048 | 1.985592      | 0.3354        | 0.31736      | 1.08264      | 1.49702            | 0.0535      | 3.357123           | 0.10171     | 0.50004        |
| Keity-049 | 1.985664      | 0.57364       | 0.52609      | 3.2217       | 2.59889            | 0.08039     | 3.232924           | 0.07403     | 0.12321        |
| Keity-050 | 2.149722      | 0.34388       | 0.30829      | 1.85777      | 2.50582            | 0.06604     | 3.176466           | 0.09271     | 0.46376        |
| Keity-051 | -0.34895      | 0.29678       | 0.29553      | 0.68716      | 1.07285            | 0.03289     | 3.525031           | 0.10937     | 0.18925        |
| Keity-052 | 2.043519      | 0.64678       | 0.60922      | 2.10176      | 1.50776            | 0.02988     | 3.339755           | 0.07058     | 0.31619        |
| Keity-053 | 3.885511      | 0.61169       | 0.55545      | 3.59012      | 2.723              | 0.05409     | 3.218189           | 0.07048     | 0.46531        |
| Keity-054 | 5.882058      | 0.46413       | 0.35593      | 6.27418      | 6.28122            | 0.13747     | 2.724871           | 0.06872     | 0.52163        |

Element concentrations (ppm) with Al as internal standard (used for inclusion monitoring)

|           | Al 27  | Ca 43   | Ti 47   | Fe 57  | Sr 88     | Y 89    | Zr 90    | Ce 140  |
|-----------|--------|---------|---------|--------|-----------|---------|----------|---------|
| Keity-001 | 120000 | 1886.6  | 542.36  | 211510 | 0.0067289 | 189.959 | 11.03883 | 0.01925 |
| Keity-002 | 120000 | 1857.52 | 492.778 | 213626 | 0.0007487 | 210.948 | 10.4948  | 0.00024 |
| Keity-003 | 120000 | 1867.78 | 467.659 | 212038 | 0.0007298 | 158.725 | 11.29737 | 0.00083 |
| Keity-004 | 120000 | 1823.34 | 417.692 | 212187 | <0.000    | 115.185 | 10.06376 | 0.00023 |
| Keity-005 | 120000 | 1843.91 | 444.432 | 216178 | 0.0072324 | 169.929 | 10.44966 | 0.01728 |
| Keity-006 | 120000 | 1887.7  | 444.457 | 216000 | 9.725E-05 | 151.733 | 10.92048 | <0.000  |
| Keity-007 | 120000 | 1840.48 | 393.221 | 215660 | 0.0008872 | 85.9135 | 9.059137 | 0.0005  |
| Keity-008 | 120000 | 1752.49 | 375.466 | 216120 | 0.0002286 | 79.1681 | 8.736708 | 0.0005  |
| Keity-009 | 120000 | 1850.22 | 353.993 | 215206 | 0.1073508 | 41.6373 | 10.31594 | 0.06172 |
| Keity-010 | 120000 | 1814.96 | 368.258 | 215334 | 0.0008992 | 67.4867 | 9.226871 | 0.01428 |
| Keity-011 | 120000 | 1802.93 | 467.296 | 215265 | 0.0014754 | 108.599 | 11.5557  | 0.00496 |
| Keity-012 | 120000 | 1768.26 | 353.395 | 217404 | <0.000    | 54.1221 | 8.533672 | 0.00102 |
| Keity-013 | 120000 | 1831.2  | 346.238 | 215745 | 0.0015587 | 43.3536 | 8.975277 | 0.00159 |
| Keity-014 | 120000 | 1829.99 | 445.267 | 213920 | 0.0022482 | 104.893 | 10.8134  | 0.00018 |
| Keity-015 | 120000 | 1782.48 | 371.703 | 217804 | 0.025257  | 68.7135 | 9.073394 | 0.06298 |
| Keity-016 | 120000 | 1812.26 | 388.856 | 214077 | 0.0104019 | 89.8347 | 9.929214 | 0.03666 |
| Keity-017 | 120000 | 1777.69 | 412.252 | 213784 | 0.0537051 | 99.9331 | 10.7973  | 0.03084 |
| Keity-018 | 120000 | 1924.55 | 442.849 | 215281 | 0.0550888 | 85.8308 | 17.6329  | 0.48895 |
| Keity-019 | 120000 | 1759.96 | 339.825 | 211498 | 0.2599166 | 58.6291 | 10.94046 | 0.27922 |
| Keity-020 | 120000 | 1882.22 | 389.338 | 213872 | 0.0544079 | 94.6854 | 14.66616 | 0.32156 |
| Keity-021 | 120000 | 1827.84 | 354.647 | 215392 | 0.0961405 | 49.0568 | 10.71623 | 0.2967  |
| Keity-022 | 120000 | 1733.98 | 399.752 | 214768 | 0.002793  | 83.8438 | 9.018496 | 0.00714 |
| Keity-023 | 120000 | 1788.7  | 343.582 | 214245 | <0.000    | 54.0688 | 8.292777 | 0.00113 |
| Keity-024 | 120000 | 1742.85 | 340.292 | 216794 | 0.0004773 | 46.3573 | 8.451555 | 0.00164 |
| Keity-025 | 120000 | 1754.11 | 347.054 | 216363 | 0.0003503 | 53.6863 | 8.442474 | 0.00016 |
| Keity-026 | 120000 | 1824.26 | 484.056 | 216054 | 0.0269106 | 175.762 | 11.51738 | 0.10408 |
| Keity-027 | 120000 | 1794.31 | 474.94  | 215761 | 0.0021816 | 182.18  | 10.31291 | 0.01317 |
| Keity-028 | 120000 | 1665.22 | 255.866 | 217040 | 0.0300221 | 47.0976 | 6.914646 | 0.11508 |
| Keity-029 | 120000 | 1661.67 | 368.612 | 214736 | 0.0004446 | 69.8067 | 8.988977 | <0.000  |
| Keity-030 | 120000 | 1772.25 | 368.822 | 217189 | 0.0673574 | 66.8784 | 9.160919 | 0.32952 |
| Keity-031 | 120000 | 1807.28 | 447.42  | 216201 | 0.044005  | 176.483 | 10.96573 | 0.17147 |
| Keity-032 | 120000 | 1732.19 | 403.567 | 216568 | 0.0703276 | 104.014 | 10.45398 | 0.22496 |
| Keity-033 | 120000 | 1778.26 | 342.26  | 216482 | 0.0001845 | 29.3944 | 9.884279 | <0.000  |
| Keity-034 | 120000 | 1771.64 | 312.117 | 219145 | 0.0004495 | 28.3784 | 8.547161 | 0.00034 |
| Keity-035 | 120000 | 1733.62 | 328.254 | 222887 | 0.0004779 | 44.8752 | 8.504398 | <0.001  |
| Keity-036 | 120000 | 1719.15 | 336.65  | 222757 | 0.0014064 | 40.2195 | 8.189477 | 0.00055 |
| Keity-037 | 120000 | 1805.17 | 324.783 | 223289 | 0.0134726 | 31.3128 | 8.695429 | 0.05957 |
| Keity-038 | 120000 | 1721.25 | 319.187 | 220971 | 0.0018442 | 31.4443 | 8.107929 | 0.00106 |
| Keity-039 | 120000 | 1787.83 | 363.819 | 215768 | 0.0561162 | 59.6902 | 13.99864 | 0.25545 |
| Keity-040 | 120000 | 1731.79 | 354.452 | 215828 | 0.0505749 | 66.7189 | 16.3435  | 0.21626 |
| Keity-041 | 120000 | 1759.65 | 191.538 | 220108 | 0.001214  | 21.6501 | 5.205847 | <0.000  |
| Keity-042 | 120000 | 1766.55 | 373.561 | 215822 | 0.0003958 | 72.9352 | 8.996813 | <0.000  |
| Keity-043 | 120000 | 1797.31 | 402.279 | 217159 | 0.0073752 | 91.3323 | 9.961069 | 0.01969 |
| Keity-044 | 120000 | 1766.72 | 391.903 | 217520 | 0.0025912 | 71.0436 | 8.62693  | 0.00139 |
| Keity-045 | 120000 | 1912.96 | 373.801 | 213245 | 0.0064376 | 93.6683 | 10.13744 | 0.06223 |
| Keity-046 | 120000 | 1808.19 | 398.887 | 218270 | 0.0126862 | 84.9405 | 10.25553 | 0.06    |

Element concentrations (ppm) with Al as internal standard (used for inclusion monitoring)

|           | Al 27  | Ca 43   | Ti 47   | Fe 57  | Sr 88     | Y 89    | Zr 90    | Ce 140  |
|-----------|--------|---------|---------|--------|-----------|---------|----------|---------|
| Keity-047 | 120000 | 1747.65 | 335.487 | 216985 | 0.0101657 | 53.7689 | 8.781591 | 0.0661  |
| Keity-048 | 120000 | 1800.94 | 340.345 | 216859 | 0.0018736 | 44.3258 | 8.656022 | 0.01139 |
| Keity-049 | 120000 | 1801.04 | 386.409 | 217261 | 0.0303857 | 79.6446 | 11.34723 | 0.10019 |
| Keity-050 | 120000 | 1751.39 | 348.216 | 215028 | 0.000308  | 69.1002 | 8.86225  | <0.000  |
| Keity-051 | 120000 | 1810.36 | 326.19  | 216397 | 0.0027648 | 54.4537 | 8.402698 | 0.00033 |
| Keity-052 | 120000 | 1828.22 | 414.859 | 212668 | 0.0327625 | 93.9178 | 13.57797 | 0.14617 |
| Keity-053 | 120000 | 1856    | 457.149 | 213120 | 0.0257399 | 94.8439 | 12.60048 | 0.10418 |
| Keity-054 | 120000 | 1813.02 | 424.563 | 213113 | 0.0024855 | 152.66  | 10.40526 | 0.00884 |



## Element conc. Contd. (ppm)

|           | <b>Nd 146</b> | <b>Sm 147</b> | <b>Yb 172</b> |
|-----------|---------------|---------------|---------------|
| Keity-001 | 0.03998       | 0.196262      | 64.97785      |
| Keity-002 | 0.008898      | 0.207195      | 58.55476      |
| Keity-003 | 0.010201      | 0.151022      | 42.76103      |
| Keity-004 | 0.00727       | 0.126717      | 27.21744      |
| Keity-005 | 0.024899      | 0.148466      | 48.08691      |
| Keity-006 | 0.009265      | 0.148971      | 39.92753      |
| Keity-007 | 0.010433      | 0.114582      | 17.49529      |
| Keity-008 | 0.005928      | 0.095379      | 17.23908      |
| Keity-009 | 0.031797      | 0.079507      | 3.73033       |
| Keity-010 | 0.019295      | 0.103663      | 10.52223      |
| Keity-011 | 0.01543       | 0.139693      | 20.67139      |
| Keity-012 | 0.003048      | 0.103227      | 6.300048      |
| Keity-013 | 0.005977      | 0.086011      | 3.320679      |
| Keity-014 | 0.003732      | 0.110943      | 23.77619      |
| Keity-015 | 0.050018      | 0.081017      | 14.52237      |
| Keity-016 | 0.025118      | 0.108149      | 20.57008      |
| Keity-017 | 0.032607      | 0.118908      | 22.03344      |
| Keity-018 | 0.443975      | 0.171066      | 20.83119      |
| Keity-019 | 0.218869      | 0.11862       | 10.1159       |
| Keity-020 | 0.303777      | 0.160939      | 18.83525      |
| Keity-021 | 0.260091      | 0.103746      | 8.035607      |
| Keity-022 | 0.012337      | 0.112617      | 22.20963      |
| Keity-023 | 0.006936      | 0.073881      | 6.765879      |
| Keity-024 | 0.002534      | 0.049064      | 9.700183      |
| Keity-025 | 0.003501      | 0.069993      | 7.047128      |
| Keity-026 | 0.06662       | 0.154539      | 49.7922       |
| Keity-027 | 0.013256      | 0.159225      | 47.90259      |
| Keity-028 | 0.060722      | 0.066425      | 7.384164      |
| Keity-029 | 0.004746      | 0.091054      | 15.27413      |
| Keity-030 | 0.134644      | 0.099421      | 12.10869      |
| Keity-031 | 0.094782      | 0.158325      | 46.32123      |
| Keity-032 | 0.119351      | 0.138731      | 20.91817      |
| Keity-033 | 0.001043      | 0.034422      | 5.892839      |
| Keity-034 | 0.002288      | 0.041611      | 3.638048      |
| Keity-035 | 0.008021      | 0.066015      | 5.213336      |
| Keity-036 | 0.007888      | 0.088566      | 3.530866      |
| Keity-037 | 0.033546      | 0.046893      | 4.555968      |
| Keity-038 | 0.002871      | 0.050004      | 3.84181       |
| Keity-039 | 0.185501      | 0.118877      | 7.390286      |
| Keity-040 | 0.226084      | 0.133655      | 10.90665      |
| Keity-041 | 0.005735      | 0.031488      | 2.439505      |
| Keity-042 | 0.002319      | 0.075841      | 17.61589      |
| Keity-043 | 0.02413       | 0.12054       | 22.15027      |
| Keity-044 | 0.010763      | 0.070975      | 17.34629      |
| Keity-045 | 0.051747      | 0.123865      | 17.00744      |
| Keity-046 | 0.054774      | 0.088915      | 24.38116      |

Element conc. Contd. (ppm)

|           | <b>Nd 146</b> | <b>Sm 147</b> | <b>Yb 172</b> |
|-----------|---------------|---------------|---------------|
| Keity-047 | 0.052838      | 0.070892      | 9.352628      |
| Keity-048 | 0.010806      | 0.065802      | 7.585418      |
| Keity-049 | 0.093311      | 0.118663      | 20.48172      |
| Keity-050 | 0.0071        | 0.089102      | 12.80428      |
| Keity-051 | 0.001823      | 0.088057      | 5.722789      |
| Keity-052 | 0.097082      | 0.123974      | 15.7003       |
| Keity-053 | 0.070536      | 0.113839      | 23.53319      |
| Keity-054 | 0.015846      | 0.135921      | 40.83397      |
